1 **Title:** One Health Genomic Surveillance and Response to a University-Based Outbreak of the  
2 SARS-CoV-2 Delta AY.25 Lineage, Arizona, 2021

3

4 **Short Title:** One Health Approach to University Outbreak of Delta

5

6 Hayley D. Yaglom<sup>1,+,\*</sup>, Matthew Maurer<sup>2,+</sup>, Brooke Collins<sup>2</sup>, Jacob Hojnacki<sup>2</sup>, Juan Monroy-  
7 Nieto<sup>1</sup>, Jolene R. Bowers<sup>1</sup>, Samuel Packard<sup>2</sup>, Daryn E. Erickson<sup>1,3,4</sup>, Zachary A. Barrand<sup>1,3,4</sup>,  
8 Kyle M. Simmons<sup>1,3,4</sup>, Breezy N. Brock<sup>1,3,4</sup>, Efreem S. Lim<sup>5</sup>, Sandra Smith<sup>6</sup>, Crystal M. Hepp<sup>1,3,4</sup>,  
9 David M. Engelthaler<sup>1</sup>

10

11 \*Corresponding author

12 Email: [hyaglom@tgen.org](mailto:hyaglom@tgen.org)

13

14 <sup>+</sup>These co-first authors contributed equally to this work.

15

16 <sup>1</sup>Translational Genomics Research Institute, Flagstaff, AZ, USA

17 <sup>2</sup>Coconino County Health and Human Services, Flagstaff, AZ, USA

18 <sup>3</sup>School of Informatics, Computing, and Cyber Systems, Northern Arizona University, Flagstaff,  
19 AZ, USA

20 <sup>4</sup>Pathogen and Microbiome Institute, Northern Arizona University, Flagstaff, AZ, USA

21 <sup>5</sup>Arizona State University, Tempe, AZ, USA

22 <sup>6</sup>Campus Health Services, Northern Arizona University, Flagstaff, AZ, USA

23

24

25

26

27 **Keywords**

28 SARS-CoV-2, Delta variant, genomic, wastewater surveillance, university

29

30 **Abstract**

31 Large scale outbreaks of the SARS-CoV-2 Delta variant have occurred in numerous settings,  
32 including universities. An outbreak of the SARS-CoV-2 Delta AY.25 lineage associated with a  
33 university campus with multiple transmission events was identified; genomic analyses  
34 characterized this outbreak and complemented contact tracing and wastewater surveillance  
35 strategies that strengthened overall public health response actions.

36 Epidemiologic and clinical data routinely gathered through contact tracing and public health  
37 investigations were matched to genomic sequencing of SARS-CoV-2 positive samples  
38 belonging to a suspect cluster identified through ongoing phylogenomic analyses. Continued  
39 phylogenetic analyses were conducted to describe the AY.25 outbreak. Wastewater collected  
40 twice weekly from sites across campus was tested for SARS-CoV-2 by RT-qPCR, and  
41 subsequently sequenced to identify variants.

42 The AY.25 outbreak was defined by a single mutation (C18804T) and comprised 379 genomes  
43 from SARS-CoV-2 positive cases associated with the university and community. Several  
44 undergraduate student gatherings and congregate living settings on campus likely contributed to  
45 the rapid spread of COVID-19 across the university with secondary transmission into the  
46 community. The clade defining mutation was also found in wastewater samples collected from  
47 around student dormitories during “move-in”, a week before the semester began, and 9 days  
48 before cases were identified.

49 Genomic, epidemiologic, and wastewater surveillance provided evidence that an AY.25 clone  
50 was likely imported into the university setting just prior to the onset of the Fall 2021 semester,  
51 rapidly spread through a subset of the student population, and then subsequent spillover  
52 occurred in the surrounding community. The university and local public health department

53 worked closely together to facilitate timely reporting of cases, identification of close contacts,  
54 and other necessary response and mitigation strategies. The emergence of new SARS-CoV-2  
55 variants and potential threat of other infectious disease outbreaks on university campuses  
56 presents an opportunity for future comprehensive One Health genomic data driven, targeted  
57 interventions.

58

## 59 **Introduction**

60 Infectious disease threats faced by university campuses are well-documented, with  
61 outbreaks of influenza, meningococcal disease, and other respiratory illnesses having been  
62 reported in these settings over the past decade [1,2,3,4]. COVID-19 has now joined this list,  
63 rapidly unfolding across universities throughout the United States (US) and globally [5, 6,7,8,9].  
64 Increasing case counts of COVID-19 and large-scale outbreaks across universities and college  
65 campuses, especially after the first year of the pandemic [10], resulted in shifts to online or  
66 hybrid learning and the need for rapid implementation of routine testing as well as  
67 isolation/quarantine programs [11,12,13]. The close contact of students in dormitories, dining  
68 areas, and lecture halls, combined with common social-behavioral activities puts this population  
69 at an increased risk. However, the high rates of COVID-19 transmission coupled with the  
70 continual emergence of new variants (e.g., Delta and Omicron) presents unique challenges [5,  
71 14] and requires multidisciplinary surveillance strategies (i.e., wastewater surveillance) and  
72 collaboration amongst partners.

73 Wastewater monitoring, a re-emerging method of surveillance, has gained significant  
74 traction during the COVID-19 pandemic. This type of surveillance has successfully provided an  
75 early warning sign of the potential spread of COVID-19 within university settings, allowing for  
76 rapid implementation of mitigation strategies [15,16,17,18,19,20,21]. While wastewater  
77 surveillance methods have differed slightly, it is well-understood that viral shedding can be  
78 detected in wastewater samples from both symptomatic and asymptomatic individuals. In

79 several instances of this type of surveillance on university campuses, SARS-CoV-2 has been  
80 detected in wastewater collected around dormitories on average seven days before human  
81 cases were identified [16,18].

82 The first cases of the Delta variant were identified in the US in July 2021 and Delta  
83 quickly became the dominant SARS-CoV-2 variant across the nation. Surveillance data showed  
84 that Delta was significantly more contagious, resulted in more severe infections, particularly in  
85 unvaccinated individuals, and was associated with breakthrough infections [22,23,24]. Robust  
86 genomic sequencing efforts in Arizona throughout the second year of the pandemic revealed  
87 the establishment and circulation of several Delta sub-lineages (e.g., B.1.617.2, AY.3, AY.25,  
88 AY.44, AY.103). One of these sub-lineages, AY.25, has mostly been seen in North America [25]  
89 and comprised approximately 7% of sequenced genomes in Arizona during fall 2021  
90 ([https://pathogen.tgen.org/covidseq-tracker/arizona\\_trends.html](https://pathogen.tgen.org/covidseq-tracker/arizona_trends.html)).

91 Routine genomic surveillance and ongoing phylogenetic analysis of sequence data from  
92 positive clinical samples identified an AY.25 clonal cluster associated with a university and the  
93 surrounding community throughout August to December 2021. The identification and  
94 characteristics of the outbreak are described here, with highlights on the integration of clinical,  
95 epidemiologic, genomic, and wastewater surveillance data. This report demonstrates the  
96 importance of implementing and maintaining one health surveillance strategies to strengthen  
97 response actions.

98

## 99 **Methods**

### 100 *University Infrastructure, Testing and Mitigation Efforts*

101 Beginning the week of August 15, 2021, a moderate sized university in Arizona opened  
102 its doors to the approximately 20,000 students for the Fall semester. The university hosted  
103 various summer programs, including sports team trainings and an engagement and mentorship  
104 program for first-generation college students (mid-June through mid-July). Individuals

105 participating in these summer programs were housed in dormitories throughout the campus.  
106 Although several students remained in the area throughout the summer in off-campus housing,  
107 the majority moved back to university dormitories August 19<sup>th</sup> through August 21<sup>st</sup> (“move-in  
108 weekend”).

109 The university had implemented several prevention strategies in the previous year of the  
110 pandemic, including mask policies, social distancing, reduced dining hall capacity, hybrid  
111 learning, encouraged vaccination, and mitigation testing. The mitigation testing was an ongoing  
112 effort to identify asymptomatic cases among students, faculty, and staff, and involved a random  
113 selection of 2,500 individuals (both vaccinated and unvaccinated) each week to participate in  
114 voluntary COVID-19 screening. This self-collected saliva-based PCR testing was available 6  
115 days a week at a designated on-campus location (through the end of the semester); testing for  
116 the general community was also available at this location through appointments. Lastly, campus  
117 health services provided rapid testing for symptomatic individuals.

118 Students living on and off campus were also encouraged to self-report positive SARS-  
119 CoV-2 test results to the university. Based on CDC guidelines at this time, students who tested  
120 positive for COVID-19 were required to isolate for 10 days and unvaccinated close contacts  
121 were quarantined for at least 8 days in designated isolation dormitories or off-campus (home of  
122 parent or friend). Mandatory dormitory-wide mitigation testing was triggered if more than 1% of  
123 the population residing in that dormitory tested positive. The campus health services team  
124 conducted extensive contact tracing to investigate close contacts and determine the need to  
125 implement additional and targeted interventions.

126 Contact tracing for COVID-19 positives cases in the community was also regularly  
127 conducted by the local public health officials. Detailed information was collected from the  
128 Arizona Medical Electronic Disease Surveillance and Intelligence System (MEDSIS) including  
129 demographics, university affiliation, on-campus residence if applicable, symptoms, travel  
130 history, participation in social gatherings or activities, close contacts, and vaccination status.

### 131 *SARS-CoV-2 Phylogenetic Analyses*

132 Whole genome sequencing of SARS-CoV-2 PCR positive samples is routinely  
133 performed by several laboratories in Arizona [26] and by the Centers for Disease Control and  
134 Prevention, using similar methodologies [27]. SARS-CoV-2 genomes publicly available through  
135 GISAID (Supplemental Table 1) from these sequencing efforts were utilized to build  
136 phylogenetic trees using the SARS-CoV-2 specific workflows  
137 (<https://github.com/nextstrain/ncov/>) in Nextstrain [28]. Genomes with less than 70% breadth of  
138 coverage relative to the Wuhan reference genome (GISAID: EPI\_ISL\_402125, NCBI:  
139 NC\_045512.2) were excluded; the G142D site, known to be associated with sequencing error,  
140 was also masked [23]. Maximum likelihood inference was executed with the IQ-TREE method  
141 (<http://www.iqtree.org>).

142 A regular review of the phylogenetic assignments identified what appeared to be a clonal  
143 cluster (i.e., multiple genomes with 0-2 single nucleotide polymorphisms (SNPs) between them  
144 being identified within the same geographical area) within the AY.25 sub-lineage of Delta.  
145 Genomic analyses for the distinct AY.25 outbreak sub-clade was shared with the local public  
146 health department. Epidemiologic, clinical, and exposure information routinely gathered through  
147 contact tracing and investigations was collated and matched with the available genomes.  
148 Duplicate genomes for the same SARS-CoV-2 positive case (e.g., repeated positive samples for  
149 same person that had been submitted for sequencing) were removed from the phylogeny. In  
150 these cases, genomes with the earliest sample collection dates were included.

151 Ethics approval was not required as this work was conducted in collaboration with a local  
152 public health agency as a public health surveillance activity, involving viral genomic sequencing  
153 and analysis of de-identified remnant specimens. Therefore, this work is exempt from needing  
154 human subjects research board approval.

155

### 156 *Wastewater Monitoring*

157 Wastewater surveillance at the university began in July 2020, and during the period of  
158 August 13<sup>th</sup> through December 8<sup>th</sup> of 2021, samples were collected twice weekly from 16 sites  
159 strategically selected to assess SARS-CoV-2 levels in different residence halls. Using a  
160 modified Moore Swab style of approach [29], Tampax Pearl Ultra Absorbency tampons were  
161 suspended in wastewater flows outside of residence halls for 48-72 hours. Subsequently,  
162 tampons were pulled from the wastewater flow and placed into a contained filled with 20mL of  
163 deionized water which was shaken vigorously for two minutes. One mL of liquid was  
164 concentrated using the Zymo Research Water Concentrating Buffer, and extractions were  
165 carried out using the Quick-DNA/RNA Miniprep Plus Kit. Extracted material was evaluated for  
166 SARS-CoV-2 using the CDC N1 RT-qPCR assay. Samples with cycle threshold values less  
167 than 35 were subsequently sequenced to identify variants of concern, using the xGen™ SARS-  
168 CoV-2 Amplicon Panel (previously the Swift Normalase Amplicon SARSCoV-2 Panel) with  
169 unique dual indices from Integrated DNA Technologies. Resulting sequencing reads were  
170 aligned to the Wuhan reference genome (GISAID: EPI\_ISL\_402125, NCBI: NC\_045512.2)  
171 using Bowtie2 [30] and mutations of interest were called using Sam Refiner [31].

172

## 173 **Results**

### 174 *Identification and Characteristics of AY.25 Outbreak Cases*

175 From August 22<sup>nd</sup> to December 4<sup>th</sup>, 2021, a total of 1,299 COVID-19 cases were  
176 identified among individuals affiliated with the university and 1,577 cases were individuals tested  
177 from the general community. Approximately 70% of positive case samples from this testing were  
178 submitted for whole genomic sequencing. Retrospective phylogenetic analysis of these publicly  
179 available SARS-CoV-2 genomes combined with sequencing data from other Arizona  
180 laboratories revealed several SARS-CoV-2 Delta variant sub-lineages (assigned by Pangolin)  
181 circulating within the university setting and surrounding county, including B.1.617.2 (n=851),  
182 AY.25 (n=451), AY.44 (n=339), and AY.103 (n=295) during the same timeframe. Of the 451

183 sequenced genomes characterized as AY.25, there was an even distribution of this lineage  
184 among the community (n=228, 50.5%) and university (n=223, 49.5%).

185         Review of these Delta sub-lineages within the larger phylogeny (Figure 1) revealed a  
186 distinct monophyletic clade of the AY.25 sub-lineage, comprising 379 total genomes  
187 (Supplemental Table 1). Of these sequenced genomes, 49.8% (n=189) were from SARS-CoV-2  
188 positive cases associated with the university (case rate of 5,883 per 100K) and 42.2% (n=160)  
189 were associated with the community (case rate of 6,349 per 100K); the affiliations of the  
190 remaining (n=31) were unknown. Additionally, when comparing the number of positive cases  
191 associated with and reported by the university, 14.5% (189/1,299) were found to be a part of  
192 this AY.25 outbreak.

193         Among just the AY.25 university associated cases, 91.0%, (172/189) were under 25  
194 years of age, while the ages of the community cases were more evenly distributed across age  
195 groups and ranged from 5-82 years. 51.9% (98/189) of the university cases were female and  
196 62.4% were white, non-Hispanic (118/189). Table 1 further displays relevant demographic,  
197 clinical, vaccination, and exposure characteristics of university and community associated  
198 cases; however, it is important to note that complete epidemiologic data was not available for  
199 every case associated with this outbreak.

200         89.9% (170/189) of university associated cases occurred among first and second-year  
201 undergraduate students living on and off campus. On-campus students comprised 65.3%  
202 (111/170) of the AY.25 university cases, with the vast majority (81.9%, 91/111) residing in four  
203 freshman dormitories. These were co-ed traditional style campus dormitories with two students  
204 per room, and a community bathroom, laundry room, kitchen, and lounge. 59/170 students  
205 (34.7%) lived in off-campus housing within commuting distance from the university during the  
206 semester. Only three individuals (1.6%) associated with the university were employees.

207         The first SARS-CoV-2 positive case associated with the outbreak for which a viral  
208 genome was produced had a collection date of August 30<sup>th</sup> (7 days after the fall semester began



209 on August 23, 2021). During an interview with public health, this case named at least four other  
210 individuals (“close group of friends”) whom they had close contact with during their infectious  
211 period; two of which resided in the same dormitory (Dormitory A) and one of whom resided in  
212 Dormitory B. Contact tracing efforts further confirmed these linkages and identified what is  
213 believed to be the index case of this epidemiologic cluster (first case in Dormitory A and the  
214 university during this time) – a symptomatic student from out-of-state, whose SARS-CoV-2  
215 positive sample collected on August 28<sup>th</sup>, but was not sequenced (Figure 2). A total of 10 cases  
216 associated with this outbreak were identified in Dormitories A and B throughout the Fall 2021  
217 semester.

218 The AY.25 outbreak peaked in the university population during the week of September  
219 19<sup>th</sup> – 25<sup>th</sup> (Calendar Week 38), and cases associated with the community peaked during the  
220 week of October 17<sup>th</sup> – 23<sup>rd</sup> (Calendar Week 42). Of the interviewed university associated  
221 cases, 36.1% (57/158) were aware they had close contact to a positive COVID-19 case. Various  
222 events and social gatherings within the first few weeks of the semester, including welcome week  
223 activities, sporting events, and house parties. While vaccination information was not available  
224 for all outbreak associated cases, 17.7% (67/379) vaccine-breakthrough cases were identified  
225 (Table 1).

226

### 227 *Phylogenetic Analysis of AY.25 Outbreak*

228 Throughout the academic semester, this particular AY.25 clone, genomically defined by  
229 a single synonymous SNP, C18804T (Figure 1), became established and evolved, following its  
230 importation into the university setting. 95 genomes are identical, and the remaining AY.25  
231 sequences in this phylogeny include up to 12 total SNP mutations across the 379 genomes  
232 identified during the outbreak from the ancestral genomes.

233 The maximum likelihood phylogeny indicates numerous instances of secondary spread  
234 occurred, however, transmission of this AY.25 clone was generally sporadic throughout the

235 community and did not extensively impact overall COVID-19 trends in the region. One non-  
236 university secondary transmission chain contained 37 viral genomes and was defined by an  
237 amino acid in the Orf1a region. Twelve of these 37 genomes (nine were identical and three had  
238 one additional SNP) were associated with individuals attending a local elementary school  
239 (collection dates of SARS-CoV-2 positive samples ranged from October 13-20<sup>th</sup>).

#### 240 *Wastewater Surveillance Confirms AY.25 Outbreak Clone*

241 As expected, wastewater sampling conducted as a baseline the week prior to students  
242 moving into university dormitories yielded no SARS-CoV-2 positive campus sites. However, the  
243 AY.25 outbreak clone, was detected in two wastewater samples collected between August 19<sup>th</sup>  
244 through 21<sup>st</sup> (move-in weekend) (Figure 2). This sample was collected seven days prior to the  
245 university's index case sample being collected, and in two different residence halls (Dormitory C  
246 and D) than the initial human cases on campus were associated with. SARS-CoV-2 virus in  
247 these wastewater samples, and seven others collected between August 30th through  
248 September 23rd contained the clade-defining mutation (C18804T). The first human cases  
249 associated with Dormitories C and D had samples collected September 3<sup>rd</sup> and 14<sup>th</sup> (neither of  
250 which were sequenced), and a total of 34 cases associated with this outbreak were identified in  
251 these two dormitories throughout the Fall semester.

252

#### 253 **Discussion**

254 The introduction, establishment, and transmission of infectious diseases leading to  
255 outbreaks on university and college campuses are inevitable, given the intimate interactions of  
256 students in dormitories and involvement in various extracurricular activities. Therefore, the  
257 integration of complementary one health approaches (e.g., contact tracing, genomic  
258 epidemiology, and wastewater surveillance) is invaluable for early detection and response to  
259 potential threats in these settings.

260 This report documents a clonal outbreak of the AY.25 Delta sub-lineage impacting a  
261 local university and surrounding community identified through ongoing phylogenetic analysis,  
262 while the outbreak was occurring. Genomic surveillance and extensive contact tracing by public  
263 health and campus health services provided strong evidence that this outbreak clone was 1)  
264 amplified by extensive interactions among students and 2) not maintained solely within the  
265 university population. Genomic epidemiologic analyses confirmed several secondary  
266 transmission chains to individuals throughout the community. However, while this distinct AY.25  
267 sub-lineage reported here was well-established (and public health data indicates the AY.25  
268 parent lineage was the second most common lineage circulating in the area), it is important to  
269 note that this outbreak was not a driver of COVID-19 transmission in the community as a whole.  
270 Furthermore, this outbreak did not influence patterns of how the virus was circulating in the  
271 general community during the Fall 2021 timeframe. Although not detailed in this report,  
272 reciprocal transmission events of other SARS-CoV-2 lineages from the community to individuals  
273 affiliated with the university likely occurred given the nature of interactions among these two  
274 sub-populations.

275 Most of the university affiliated cases were first-year undergraduate students living on  
276 and off campus, but frequently interacting with each other in residence halls, at campus events  
277 and parties during the early weeks of the semester. Previous analyses [13] found that COVID-  
278 19 cases were not correlated with dormitory living and in-person classes, and that infections  
279 have largely been acquired in off-campus settings. While this may be representative of the  
280 nature of COVID-19 outbreaks amongst some universities, evaluation of this AY.25 outbreak  
281 showed that at minimum, the initial rapid growth phase of the outbreak occurred among  
282 students who had close interactions with each other in four dormitories (i.e., Dormitories A-D).  
283 Continued transmission of the virus was then through additional student interactions once the  
284 AY.25 clone was established in that population. Of interest, out of the 111 student cases living  
285 on-campus, 47.7% (n=53) lived in the same dormitory. This could be a potential artifact of the

286 mitigation testing, but also a result of the close contact students had with each other in that  
287 dormitory. The findings from this outbreak also demonstrate that there is limited risk of  
288 transmission to staff and university faculty, providing further evidence that viral spread in a  
289 classroom setting is not always a driver of university outbreaks.

290 Furthermore, unlike the report by Valesano, et al (2021) [32] which found that university  
291 cases in Michigan did not contribute enhanced transmission in the community, the viral clone  
292 discussed here was identified in more than 40% of cases with no known association with the  
293 university (i.e., community). This may in part be due to the relatively small size of the  
294 surrounding city (estimated population of ~75,000) and its tourism-based economy. Although  
295 low levels of ongoing transmission occurred throughout the remainder of the semester, mostly  
296 within the community, the AY.25 outbreak began to wane by the end of October 2021, likely in  
297 part to the enhanced efforts deployed by the university.

298 Data from wastewater surveillance efforts, which had been in place across the university  
299 for almost two years to provide an early warning for COVID-19 case clusters, adds an important  
300 layer to this outbreak. Following the phylogenetic analysis of clinical samples, genomic  
301 characterization of positive wastewater samples collected from multiple dormitory sites across  
302 campus during move-in weekend and the subsequent weeks showed the presence of the clade  
303 defining mutation. These findings thereby confirmed the presence of the AY.25 outbreak clone  
304 in three different dormitories (including Dormitories C and D) prior to the initial identification of  
305 human cases. The community had experienced a steady level of COVID-19 cases throughout  
306 the summer, and limited activities occurred on campus, except for the previously mentioned  
307 sports-related trainings and mentorship programs.

308 While hundreds of Delta variant sub-lineages were characterized throughout 2021,  
309 AY.25 was not a dominant sub-lineage across the U.S.; however, in-depth phylogenetic analysis  
310 of outbreak cases associated with large public summer gatherings in Massachusetts revealed  
311 that AY.25 was responsible for a single cluster containing 84% of outbreak-associated genomes

312 [33]. A second analysis of Delta variant associated vaccine breakthrough infections in New York  
313 identified a small cluster of AY.25 with a signature mutation in the spike protein, S112L [7].  
314 According to Duerr et al (2022) [34], while S112L is not a Delta-defining mutation, it appears to  
315 be more commonly found in genomes associated with vaccine breakthrough cases. None of the  
316 viral sequences in the Arizona AY.25 university outbreak, including the 67 vaccine breakthrough  
317 cases, contained that genomic signature.

318         There are some important limitations to address. First, the university reported an  
319 adherence rate of 25-30% for weekly mitigation testing offered throughout the semester, and  
320 further noted that students (mainly those living off-campus) who acquired COVID-19 testing  
321 outside of campus health services may not have reported positive results, which could have  
322 impacted case identification, contact tracing and further prevention efforts. Second, complete  
323 epidemiologic information was not available for every positive case associated with this  
324 outbreak. Although an extensive effort was made to by public health and campus health officials  
325 to conduct thorough contact tracing, many cases are lost to follow-up. Lastly, the number of  
326 individuals associated with this outbreak is likely an underestimate given that not every infected  
327 patient was likely tested, and sequencing was not performed on every PCR-positive sample or  
328 performed on any antigen-based or rapid PCR positive samples. Despite these limitations, there  
329 is supporting evidence that the AY.25 clone was likely imported into the university setting just  
330 prior to the onset of the Fall semester, rapidly spread through a subset of the student  
331 population, and then subsequent spillover occurred in the surrounding community.

332

### 333 **Public Health Implications**

334         As we see promise of SARS-CoV-2 endemicity in the US, it is critical for universities to  
335 have guidance and policies in place for future outbreaks of COVID-19 and other communicable  
336 diseases. Implementation of multifaceted interventions has proven successful; these efforts  
337 included a combination of university wide screening programs, vaccination requirements (where

338 applicable), social-behavioral policies (e.g., social distancing and masking), flexible education  
339 delivery models (e.g., hybrid learning options), and enhanced contact tracing to minimize spread  
340 before establishment in the campus community.

341         Additionally, collaboration and communication between universities and local public  
342 health entities is an important component of timely outbreak response. In the case described  
343 here, the university and public health department, having already worked closely throughout the  
344 pandemic, were able to easily identify and investigate clusters of cases within the dormitories.  
345 University testing data identified dormitories exceeding the 1% positivity threshold needed to  
346 require mitigation testing. This information was sent by the university to local public health  
347 workers who used case investigation data to verify that the potential outbreak met the  
348 necessary criteria for mandatory mitigation testing. Once verified, the university began  
349 dormitory-wide mitigation testing in combination with the other established prevention strategies.  
350 Furthermore, increases in the presence of SARS-CoV-2 in wastewater samples resulted in the  
351 university enhancing their mitigation testing procedures around the impacted campus areas.  
352 The rapid spread of Omicron throughout universities [5, 35] highlights the continued need for  
353 these efforts as well as ongoing surveillance programs to identify early infections before  
354 symptomatic cases and widespread transmission occurs.

355         The incorporation of genomic epidemiology and wastewater surveillance can  
356 complement the more routine activities and advance the state of public health surveillance.  
357 Genomic surveillance and epidemiology provide the only empirical means for confirming the  
358 presence of a clonal outbreak and identifying which individuals are and, importantly, which are  
359 not part of an outbreak or cluster, especially, when multiple variants or pathogen strains are  
360 circulating. Analysis of the information gathered from cases that are known to be part of the  
361 same outbreak increases the ability to gain insight on how the virus was being spread among  
362 this population. Inclusion of non-traditional samples sources, such as wastewater, in genomic  
363 analyses can provide valuable early warning information or, at a minimum, provide additional

364 context on likely outbreak sources and scope of spread. Wastewater-based epidemiology can  
365 also be applied to other infectious diseases of interest, such as influenza and enteric infections.

366 Understanding transmission patterns within the outbreak population helps identify  
367 improved disease prevention and mitigation strategies, increasing community resilience for  
368 future outbreaks. The potential threat of other infectious disease outbreaks on university  
369 campuses and in other settings presents an opportunity for future comprehensive one health  
370 data driven, targeted interventions.

371

372

### 373 **References**

374

- 375 1. Delahoy MJ, Mortenson L, Bauman L, et al. Influenza A(H3N2) Outbreak on a University  
376 Campus - Michigan, October-November 2021. *MMWR Morb Mortal Wkly Rep*.  
377 2021;70(49):1712-1714. 2021 Dec 10. doi:10.15585/mmwr.mm7049e1  
378
- 379 2. Kujawski SA, Lu X, Schneider E, et al. Outbreaks of Adenovirus-associated Respiratory  
380 Illness on 5 College Campuses in the United States, 2018-2019. *Clin Infect Dis*.  
381 2021;72(11):1992-1999. doi:10.1093/cid/ciaa465  
382
- 383 3. Shah M, Ferra G, Fitzgerald S, Barreira PJ, Sabeti PC, Colubri A. Containing the spread  
384 of mumps on college campuses. *R Soc Open Sci*. 2022;9(1):210948.  
385 doi:10.1098/rsos.210948  
386
- 387 4. Soeters HM, McNamara LA, Blain AE, et al. University-Based Outbreaks of  
388 Meningococcal Disease Caused by Serogroup B, United States, 2013-2018. *Emerg*  
389 *Infect Dis*. 2019;25(3):434-440. doi:10.3201/eid2503.181574

- 390  
391 5. Fowle N, Garrett B, Floyd OL, et al. University-Associated SARS-CoV-2 Omicron BA.2  
392 Infections, Maricopa County, Arizona, USA, 2022. *Emerg Infect Dis.* 2022;28(7):1520-  
393 1522. doi:10.3201/eid2807.220470  
394
- 395 6. Doyle K, Teran RA, Reefhuis J, et al. Multiple Variants of SARS-CoV-2 in a University  
396 Outbreak After Spring Break - Chicago, Illinois, March-May 2021. *MMWR Morb Mortal*  
397 *Wkly Rep.* 2021;70(35):1195-1200. doi:10.15585/mmwr.mm7035a3  
398
- 399 7. Fox MD, Bailey DC, Seamon MD, Miranda ML. Response to a COVID-19 Outbreak on a  
400 University Campus - Indiana, August 2020. *MMWR Morb Mortal Wkly Rep.*  
401 2021;70(4):118-122. doi:10.15585/mmwr.mm7004a3  
402
- 403 8. Wilson E, Donovan CV, Campbell M, et al. Multiple COVID-19 Clusters on a University  
404 Campus - North Carolina, August 2020. *MMWR Morb Mortal Wkly Rep.*  
405 2020;69(39):1416-1418. doi:10.15585/mmwr.mm6939e3  
406
- 407 9. Schultes O, Clarke V, Paltiel AD, Cartter M, Sosa L, Crawford FW. COVID-19 Testing  
408 and Case Rates and Social Contact Among Residential College Students in Connecticut  
409 During the 2020-2021 Academic Year. *JAMA Netw Open.* 2021;4(12):e2140602.  
410 doi:10.1001/jamanetworkopen.2021.40602  
411
- 412 10. New York Times. Tracking Coronavirus Cases at U.S. Colleges and Universities. The  
413 New York Times. 021 Feb 25. [Cited 2022 Feb 3]. Available from:  
414 <https://www.nytimes.com/interactive/2021/us/college-covid-tracker.html> 2  
415



- 416 11. Walke HT, Honein MA, Redfield RR. Preventing and Responding to COVID-19 on  
417 College Campuses. *JAMA*. 2020;324(17):1727-1728. doi:10.1001/jama.2020.20027  
418
- 419 12. Paltiel AD, Zheng A, Walensky RP. Assessment of SARS-CoV-2 Screening Strategies to  
420 Permit the Safe Reopening of College Campuses in the United States. *JAMA Netw*  
421 *Open*. 2020;3(7):e2016818. doi:10.1001/jamanetworkopen.2020.16818  
422
- 423 13. Hamer DH, White LF, Jenkins HE, et al. Assessment of a COVID-19 Control Plan on an  
424 Urban University Campus During a Second Wave of the Pandemic. *JAMA Netw Open*.  
425 2021;4(6):e2116425. doi:10.1001/jamanetworkopen.2021.16425  
426
- 427 14. van Oosterhout C, Hall N, Ly H, Tyler KM. COVID-19 evolution during the pandemic -  
428 Implications of new SARS-CoV-2 variants on disease control and public health policies.  
429 *Virulence*. 2021;12(1):507-508. doi:10.1080/21505594.2021.1877066  
430
- 431 15. Betancourt WQ, Schmitz BW, Innes GK, et al. COVID-19 containment on a college  
432 campus via wastewater-based epidemiology, targeted clinical testing and an  
433 intervention. *Sci Total Environ*. 2021;779:146408. doi:10.1016/j.scitotenv.2021.146408  
434
- 435 16. Gibas C, Lambirth K, Mittal N, et al. Implementing building-level SARS-CoV-2  
436 wastewater surveillance on a university campus. *Sci Total Environ*. 2021;782:146749.  
437 doi:10.1016/j.scitotenv.2021.146749  
438
- 439 17. Harris-Lovett S, Nelson KL, Beamer P, et al. Wastewater Surveillance for SARS-CoV-2  
440 on College Campuses: Initial Efforts, Lessons Learned, and Research Needs. *Int J*  
441 *Environ Res Public Health*. 2021;18(9):4455. doi:10.3390/ijerph18094455

442

443 18. Karthikeyan S, Nguyen A, McDonald D, et al. Rapid, Large-Scale Wastewater  
444 Surveillance and Automated Reporting System Enable Early Detection of Nearly 85% of  
445 COVID-19 Cases on a University Campus. *mSystems*. 2021;6(4):e0079321.  
446 doi:10.1128/mSystems.00793-21

447

448 19. Scott LC, Aubee A, Babahaji L, Vigil K, Tims S, Aw TG. Targeted wastewater  
449 surveillance of SARS-CoV-2 on a university campus for COVID-19 outbreak detection  
450 and mitigation. *Environ Res*. 2021;200:111374. doi:10.1016/j.envres.2021.111374

451

452 20. Vo V, Tillett RL, Chang CL, Gerrity D, Betancourt WQ, Oh EC. SARS-CoV-2 variant  
453 detection at a university dormitory using wastewater genomic tools. *Sci Total Environ*.  
454 2022;805:149930. doi:10.1016/j.scitotenv.2021.149930

455

456 21. Wang Y, Liu P, Zhang H, et al. Early warning of a COVID-19 surge on a university  
457 campus based on wastewater surveillance for SARS-CoV-2 at residence halls  
458 [published online ahead of print, 2022 Jan 25]. *Sci Total Environ*. 2022;821:153291.  
459 doi:10.1016/j.scitotenv.2022.153291

460

461 22. Bian L, Gao Q, Gao F, et al. Impact of the Delta variant on vaccine efficacy and  
462 response strategies. *Expert Rev Vaccines*. 2021;20(10):1201-1209.  
463 doi:10.1080/14760584.2021.1976153

464

465 23. Christensen PA, Olsen RJ, Long SW, et al. Delta Variants of SARS-CoV-2 Cause  
466 Significantly Increased Vaccine Breakthrough COVID-19 Cases in Houston, Texas. *Am*  
467 *J Pathol*. 2022;192(2):320-331. doi:10.1016/j.ajpath.2021.10.019

- 468
- 469 24. Lin L, Liu Y, Tang X, He D. The Disease Severity and Clinical Outcomes of the SARS-
- 470 CoV-2 Variants of Concern. *Front Public Health*. 2021;9:775224.
- 471 doi:10.3389/fpubh.2021.775224
- 472
- 473 25. Latif AA, Mullen JL, Alkuzweny M, et.al. AY.25 Lineage Report. *outbreak.info*. [Cited
- 474 2022 May 3]. Available from: <https://outbreak.info/situation-reports?pango=AY.25>.
- 475
- 476 26. Ladner JT, Larsen BB, Bowers JR, et al. An Early Pandemic Analysis of SARS-CoV-2
- 477 Population Structure and Dynamics in Arizona. *mBio*. 2020;11(5):e02107-20.
- 478 doi:10.1128/mBio.02107-20
- 479
- 480 27. Folkerts ML, Lemmer D, Pfeiffer A, et al. Methods for sequencing the pandemic: benefits
- 481 of rapid or high-throughput processing. *F1000Res*. 2021;10:ISCB Comm J-48.
- 482 doi:10.12688/f1000research.28352.2
- 483
- 484 28. Hadfield J, Megill C, Bell SM, et al. Nextstrain: real-time tracking of pathogen evolution.
- 485 *Bioinformatics*. 2018;34(23):4121-4123. doi:10.1093/bioinformatics/bty407
- 486
- 487 29. Moore B. The detection of enteric carriers in towns by means of sewage examination. *J*
- 488 *R Sanit Inst*. 1951;71(1):57-60. doi:10.1177/146642405107100109
- 489
- 490 30. Langmead B, Salzberg SL. Fast gapped-read alignment with Bowtie 2. *Nat Methods*.
- 491 2012;9(4):357-359. doi:10.1038/nmeth.1923
- 492

- 493 31. Gregory DA, Wieberg CG, Wenzel J, Lin CH, Johnson MC. Monitoring SARS-CoV-2  
494 Populations in Wastewater by Amplicon Sequencing and Using the Novel Program SAM  
495 Refiner. *Viruses*. 2021;13(8):1647. doi:10.3390/v13081647  
496
- 497 32. Valesano AL, Fitzsimmons WJ, Blair CN, et al. SARS-CoV-2 Genomic Surveillance  
498 Reveals Little Spread From a Large University Campus to the Surrounding Community.  
499 *Open Forum Infect Dis*. 2021;8(11): ofab518. doi:10.1093/ofid/ofab518  
500
- 501 33. Siddle KJ, Krasilnikova LA, Moreno GK, et al. Evidence of transmission from fully  
502 vaccinated individuals in a large outbreak of the SARS-CoV-2 Delta variant in  
503 Provincetown, Massachusetts. Preprint. medRxiv. 2021;2021.10.20.21265137.  
504 doi:10.1101/2021.10.20.21265137  
505
- 506 34. Duerr R, Dimartino D, Marier C, et al. Clinical and genomic signatures of rising SARS-  
507 CoV-2 Delta breakthrough infections in New York. Preprint. medRxiv.  
508 2021;2021.12.07.21267431. doi:10.1101/2021.12.07.21267431  
509
- 510 35. Petros BA, Turcinovic J, Welch NL, et al. Early introduction and rise of the Omicron  
511 SARS-CoV-2 variant in highly vaccinated university populations. Preprint. medRxiv.  
512 2022; 10.1101/2022.01.27.22269787.  
513  
514  
515  
516  
517  
518

519 **Acknowledgements**

520 The authors wish to acknowledge the public health efforts of the local county health department  
521 and university campus health services during this pandemic to ensure the safety and well-being  
522 of the university population and community. We also wish to thank the NARBHA Institute and  
523 the Arizona Department of Health Services (AZDHS) for funding support for this work. The  
524 authors extend full gratitude to the executive team and administrative staff at the local university  
525 for their support of this work, review of the manuscript and collegial collaborations. We also  
526 would like to thank Taylor Martins from AZDHS for his assistance in acquiring epidemiological  
527 data for cases associated with this outbreak. Lastly, we are extremely grateful to the GISAID  
528 Initiative and all its data contributors, specifically those from Arizona State University, Centers  
529 for Disease Control and Prevention, and Translational Genomics Research Institute laboratories  
530 responsible for obtaining SARS-CoV-2 positive specimens and generating viral genetic  
531 sequence data.

532

533

534

535

536

537

538

539

540

541

542

543

544
